# Supplementary material for: WEPA: a reusable waste biomass-derived catalyst for external oxidant/metal-free quinoxaline synthesisviatandem condensation–cyclization–oxidation of α-hydroxy ketones
Source: Royal Society of Chemistry journal article supplement (doi:10.1039/d2gc02386e), 2022-01-01
Supplement: d2gc02386e1.pdf [file d2gc02386e1.pdf]

## Supporting Information

for

# **WEPA: A reusable waste biomass-originated catalyst for external oxidant/metal-free quinoxalines synthesis via tandem condensation-cyclization-oxidation of $\alpha$ -hydroxy ketones**

Bandameeda Ramesh Naidu, Katta Venkateswarlu\*

*Laboratory for Synthetic & Natural Products Chemistry, Department of Chemistry, Yogi Vemana University, Kadapa 516005, India*

---

\* Corresponding author.

*E-mail address:* kvenkat@yogivemanauniversity.ac.in (K. Venkateswarlu)

## TABLE OF CONTENTS

| Sl. No. | Content                                              | Page – page |
|---------|------------------------------------------------------|-------------|
| 1.      | Characterization data of quinoxalines                | 3 – 7       |
| 2.      | Copies of $^1\text{H}$ & $^{13}\text{C}$ NMR Spectra | 8 – 21      |
| 3.      | XPS data of WEPA                                     | 22 – 25     |
| 4.      | XRF data of WEPA                                     | 26 – 26     |

## 1. Characterization data of quinoxalines

### Melting points of quinoxalines

| Entry | Quinoxalines ( <b>3</b> ) | Melting point (°C) |                          |
|-------|---------------------------|--------------------|--------------------------|
|       |                           | Present            | Reported                 |
| 1     | <b>3aa</b>                | 122–124            | 126–127 <sup>1</sup>     |
| 2     | <b>3ab</b>                | 124–126            | 120–121 <sup>2</sup>     |
| 3     | <b>3ac</b>                | 115–117            | 116–117 <sup>1</sup>     |
| 4     | <b>3ad</b>                | 177–179            | 170–172 <sup>3</sup>     |
| 5     | <b>3ee</b>                | 120–122            | 122–123 <sup>2</sup>     |
| 6     | <b>3af</b>                | 145–147            | 140–142 <sup>1</sup>     |
| 7     | <b>3ag</b>                | 138–140            | 142–143 <sup>4</sup>     |
| 8     | <b>3ah</b>                | 153–155            | 149–150 <sup>5</sup>     |
| 9     | <b>3ai</b>                | 152–154            | 148–150 <sup>4</sup>     |
| 10    | <b>3aj</b>                | 161–163            | 156–158 <sup>6</sup>     |
| 11    | <b>3ak</b>                | 151–153            | 147–148 <sup>4</sup>     |
| 12    | <b>3al</b>                | 126–128            | 122–124 <sup>7</sup>     |
| 13    | <b>3am</b>                | 191–193            | 187–189 <sup>3</sup>     |
| 14    | <b>3an</b>                | 141–142            | 134–136 <sup>1</sup>     |
| 15    | <b>3ao</b>                | 104–106            | –                        |
| 16    | <b>3ap</b>                | 122–124            | 122–124 <sup>1</sup>     |
| 17    | <b>3aq</b>                | 117–119            | 115.5–116.5 <sup>8</sup> |
| 18    | <b>3ar</b>                | 151–153            | 152–154 <sup>1</sup>     |
| 19    | <b>3as</b>                | 96–98              | –                        |
| 20    | <b>3at</b>                | 91–93              | 91–92 <sup>10</sup>      |
| 21    | <b>3au</b>                | 70–72              | 71–72 <sup>10</sup>      |
| 22    | <b>3av</b>                | 88–90              | 89–90 <sup>10</sup>      |
| 23    | <b>3aw</b>                | 185–187            | 183–184 <sup>10</sup>    |
| 24    | <b>3ax</b>                | 135–137            | 132–134 <sup>11</sup>    |
| 25    | <b>3ay</b>                | 261–263            | 258–260 <sup>12</sup>    |
| 26    | <b>3az</b>                | 328–330            | 320 <sup>12</sup>        |
| 27    | <b>3ba</b>                | 67–69              | 67–69 <sup>13</sup>      |
| 28    | <b>3bb</b>                | 109–111            | 107–112 <sup>14</sup>    |
| 29    | <b>3bc</b>                | 122–124            | 120–121 <sup>15</sup>    |
| 30    | <b>3bd</b>                | 138–140            | 140–141 <sup>13</sup>    |
| 31    | <b>3be</b>                | 211–213            | 209–210 <sup>16</sup>    |

## Physical appearance and $^1\text{H}$ NMR, $^{13}\text{C}$ NMR and mass spectral data of quinoxalines

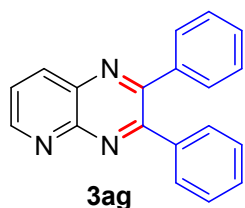

**2,3-Diphenylpyrido[2,3-*b*]pyrazine (3ag).**<sup>4</sup> Pale pink solid; Yield: 94% (0.8 h);  $^1\text{H}$  NMR (400 MHz,  $\text{CDCl}_3$ ):  $\delta$  (ppm) 9.17 (dd,  $J = 2.0, 4.0$  Hz, 1H), 8.52 (dd,  $J = 2.0, 8.4$  Hz, 1H), 7.71 (dd,  $J = 4.4, 8.4$  Hz, 1H), 7.65–7.62 (m, 2H), 7.57–7.54 (m, 2H), 7.41–7.30 (m, 6H);  $^{13}\text{C}$  NMR (100 MHz,  $\text{CDCl}_3$ ):  $\delta$  (ppm) 156.3, 154.7, 154.1, 149.9, 138.6, 138.1, 136.2, 130.3, 129.8, 129.5, 129.3, 128.4, 128.2, 125.2; ESMS:  $m/z$  284.17 (M+1).

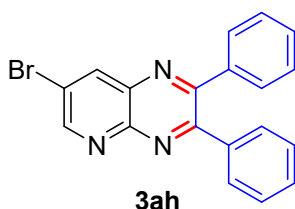

**7-Bromo-2,3-diphenylpyrido[2,3-*b*]pyrazine (3ah).**<sup>5</sup> Pale yellow solid; Yield: 90% (0.9 h);  $^1\text{H}$  NMR (400 MHz,  $\text{CDCl}_3$ ):  $\delta$  (ppm) 9.16 (d,  $J = 2.4$  Hz, 1H), 8.68 (d,  $J = 2.4$  Hz, 1H), 7.63–7.60 (m, 2H), 7.56–7.52 (m, 2H), 7.43–7.30 (m, 6H);  $^{13}\text{C}$  NMR (100 MHz,  $\text{CDCl}_3$ ):  $\delta$  (ppm) 156.5, 155.5, 155.1, 148.3, 139.4, 138.1, 137.8, 136.4, 130.2, 129.9, 129.7, 129.6, 128.5, 128.3, 121.0; ESMS:  $m/z$  362.27 and 364.23 (1:1) (M+1 and M+3).

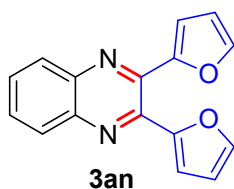

**2,3-Di(2-furanyl)quinoxaline (3an).**<sup>3</sup> Gold colour solid; Yield: 98% (0.8 h);  $^1\text{H}$  NMR (400 MHz,  $\text{CDCl}_3$ ):  $\delta$  (ppm) 8.14 (dd,  $J = 3.2, 6.2$  Hz, 2H), 7.5 (dd,  $J = 3.2, 6.4$  Hz, 2H), 7.63 (d,  $J = 1.6$  Hz, 2H), 6.6 (d,  $J = 3.6$  Hz, 2H), 6.57 (dd,  $J = 2.0, 3.6$  Hz, 2H);  $^{13}\text{C}$  NMR (100 MHz,  $\text{CDCl}_3$ ):  $\delta$  (ppm) 150.8, 144.2, 142.7, 140.7, 130.4, 129.1, 113.0, 111.9; ESMS:  $m/z$  263.43 (M+1).

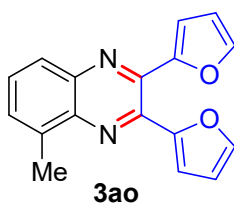

**2,3-Di(2-furanyl)-5-methylquinoxaline (3ao).**<sup>1</sup> Cream colour solid; Yield: 96% (0.9 h);  $^1\text{H}$  NMR (400 MHz,  $\text{CDCl}_3$ ):  $\delta$  (ppm) 7.99–7.96 (m, 2H), 7.66–7.56 (m, 3H), 6.81 (d,  $J = 3.2$  Hz, 1H), 6.59–6.53 (m, 3H), 2.82 (s, 3H);  $^{13}\text{C}$  NMR (100 MHz,  $\text{CDCl}_3$ ):  $\delta$  (ppm) 151.7, 151.0, 144.2, 143.8, 142.1, 141.3, 140.8, 139.8, 137.5, 130.2 (2C), 126.9, 112.9, 112.5, 111.9, 111.8, 17.1; ESMS:  $m/z$  277.31 (M+1).

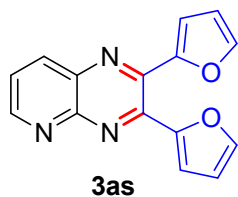

**2,3-Di(2-furanyl)pyrido[2,3-*b*]pyrazine (3as).** Cream colour solid; Yield: 90% (0.8 h);  $^1\text{H}$  NMR (400 MHz,  $\text{CDCl}_3$ ):  $\delta$  (ppm) 9.12 (dd,  $J = 2.0, 4.4$  Hz, 1H), 8.47 (dd,  $J = 2.0, 8.0$  Hz, 1H), 7.70 (dd,  $J = 1.0, 3.6$  Hz, 1H), 6.75 (dd,  $J = 1.0, 3.6$  Hz, 1H), 6.61 (dd,  $J = 2.0, 3.6$  Hz, 1H), 6.59 (dd,  $J = 1.6, 3.6$  Hz, 1H);  $^{13}\text{C}$  NMR (100 MHz,  $\text{CDCl}_3$ ):  $\delta$  (ppm) 154.4, 150.6, 150.4, 149.2, 145.0, 144.8, 148.7, 143.3, 137.8, 135.8, 125.4, 114.7, 114.0, 112.3, 112.1; ESMS:  $m/z$  264.36 (M+1).

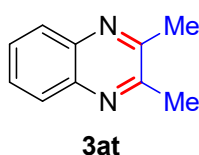

**2,3-Dimethylquinoxaline (3at).**<sup>2</sup> White solid; Yield: 94% (0.9 h);  $^1\text{H}$  NMR (400 MHz,  $\text{CDCl}_3$ ):  $\delta$  (ppm) 7.95 (dd,  $J = 3.5, 6.3$  Hz, 2H), 7.63 (dd,  $J = 3.5, 6.3$  Hz, 2H), 2.78 (s, 6H);  $^{13}\text{C}$  NMR (100 MHz,  $\text{CDCl}_3$ ):  $\delta$  (ppm) 153.5, 141.0, 128.9, 128.3, 23.2; ESMS:  $m/z$  159.08 (M+1).

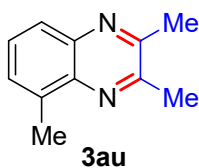

**2,3,5-Trimethylquinoxaline (3au).**<sup>2</sup> Cream colour solid; Yield: 91% (1 h);  $^1\text{H}$  NMR (400 MHz,  $\text{CDCl}_3$ ):  $\delta$  (ppm) 7.80 (d,  $J = 8.1$  Hz, 1H), 7.53 (t,  $J = 7.4$  Hz, 1H), 7.47 (d,  $J = 7.0$  Hz, 1H), 2.76 (s, 3H), 2.72 (s, 3H), 2.70 (s, 3H);  $^{13}\text{C}$  NMR (100 MHz,  $\text{CDCl}_3$ ):  $\delta$  (ppm) 152.8, 152.2, 141.1, 140.3, 136.7, 128.8, 128.4, 126.1, 23.4, 23.1, 17.1; ESMS:  $m/z$  173.02 (M+1).

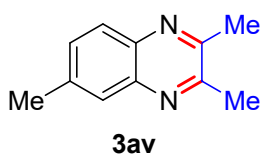

**2,3,6-Trimethylquinoxaline (3av).**<sup>2</sup> Cream colour solid; Yield: 93% (0.8 h);  $^1\text{H}$  NMR (400 MHz,  $\text{CDCl}_3$ ):  $\delta$  (ppm) 7.86 (d,  $J = 8.6$  Hz, 1H), 7.75 (m, 1H), 7.49 (d,  $J = 8.6$  Hz, 1H), 2.70 (s, 6H), 2.55 (s, 3H);  $^{13}\text{C}$  NMR (100 MHz,  $\text{CDCl}_3$ ):  $\delta$  (ppm) 153.3, 152.4, 141.1, 139.5, 139.2, 131.0, 127.8, 127.3, 23.2, 23.1, 21.7; ESMS:  $m/z$  173.15 (M+1).

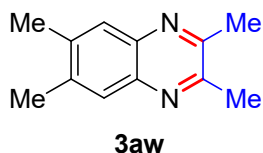

**2,3,6,7-Tetramethylquinoxaline (3aw).** White solid; Yield: 92% (0.8 h);  $^1\text{H}$  NMR (400 MHz,  $\text{CDCl}_3$ ):  $\delta$  (ppm) 7.70 (s, 2H), 2.68 (s, 6H), 2.44 (s, 6H);  $^{13}\text{C}$  NMR (100 MHz,  $\text{CDCl}_3$ ):  $\delta$  (ppm) 152.3, 140.0, 139.0, 127.5, 23.1, 20.3; ESMS:  $m/z$  187.37 (M+1).

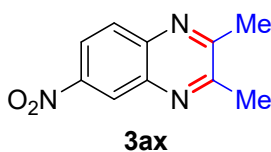

**2,3-Dimethyl-6-nitroquinoxaline (3ax).**<sup>17</sup> Cream colour solid; Yield: 86% (1.1 h); <sup>1</sup>H NMR (400 MHz, CDCl<sub>3</sub>): δ (ppm) 8.9 (d, *J* = 2.5 Hz, 1H), 8.44 (dd, *J* = 2.5, 9.1 Hz, 1H), 8.10 (d, *J* = 9.1 Hz, 1H), 2.80 (s, 6H); <sup>13</sup>C NMR (100 MHz, CDCl<sub>3</sub>): δ (ppm) 157.3, 156.3, 147.1, 143.7, 139.9, 129.9, 124.9, 122.4, 23.5, 23.3; ESMS: *m/z* 202.11 (M-1).

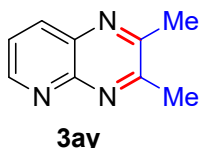

**2,3-Dimethylpyrido[2,3-*b*]pyrazine (3ay).**<sup>18</sup> White solid; Yield: 92% (1 h); <sup>1</sup>H NMR (400 MHz, CDCl<sub>3</sub>): δ (ppm) 9.05 (dd, *J* = 2.0, 4.4 Hz, 1H), 8.33 (dd, *J* = 2.0, 8.0 Hz, 1H), 7.63 (dd, *J* = 4.4, 8.0 Hz, 1H), 2.82 (s, 3H), 2.78 (s, 3H); <sup>13</sup>C NMR (100 MHz, CDCl<sub>3</sub>): δ (ppm) 157.3, 155.0, 152.6, 150.2, 137.3, 135.9, 124.3, 23.5, 23.0; ESMS: *m/z* 160.02 (M+1).

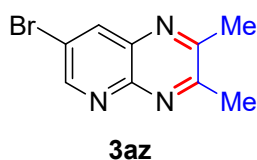

**7-Bromo-2,3-dimethylpyrido[2,3-*b*]pyrazine (3az).**<sup>12</sup> Light pink solid; Yield: 89% (1.1 h); <sup>1</sup>H NMR (400 MHz, CDCl<sub>3</sub>): δ (ppm) 9.05 (d, *J* = 2.8 Hz, 1H), 8.50 (d, *J* = 2.8 Hz, 1H), 2.80 (s, 3H), 2.78 (s, 3H); <sup>13</sup>C NMR (100 MHz, CDCl<sub>3</sub>): δ (ppm) 157.7, 156.1, 153.7, 148.6, 138.8, 136.2, 119.9, 23.6, 23.1; ESMS: *m/z* 338.27 and 340.17 (1:1) (M+1 and M+3).

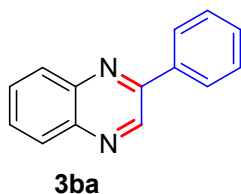

**2-Phenylquinoxaline (3ba).**<sup>19</sup> Pale red solid; Yield: 94% (1.5 h); <sup>1</sup>H NMR (400 MHz, CDCl<sub>3</sub>): δ (ppm) 9.32 (s, 1H), 8.23–8.09 (m, 4H), 7.82–7.69 (m, 2H), 7.62–7.49 (m, 3H); <sup>13</sup>C NMR (100 MHz, CDCl<sub>3</sub>): δ (ppm) 152.0, 143.5, 142.4, 141.7, 136.9, 130.4, 130.3, 129.7 (2C), 129.3, 129.2, 127.7.

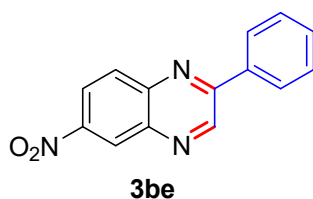

**6-Nitro-2-phenylquinoxaline (3be).**<sup>19</sup> Yellowish solid; Yield: 88% (2.3 h); <sup>1</sup>H NMR (400 MHz, CDCl<sub>3</sub>): δ (ppm) 9.5 (s, 1H), 9.03 (d, *J* = 2.5 Hz, 1H), 8.56 (dd, *J* = 2.5, 9.2 Hz, 1H), 8.32–8.24 (m, 3H), 7.72–7.47 (m, 3H); <sup>13</sup>C NMR (100 MHz, CDCl<sub>3</sub>): δ (ppm) 154.4, 147.5, 145.6, 145.0, 140.4, 135.7, 131.5, 131.3, 129.5, 128.0, 125.8, 123.9.

## References

- 1 A. Kamal, K. S. Babu, S. Faazil, S. M. A. Hussaini, A. B. Shaik, *RSC Adv.*, 2014, **4**, 46369–46377.
- 2 A. Go, G. Lee, J. Kim, S. Bae, B. M. Lee, B. H. Kim, *Tetrahedron*, 2015, **71**, 1215–1226.
- 3 A. Kamal, K. S. Babu, S. M. A. Hussaini, R. Mahesh, A. Alarifi, *Tetrahedron Lett.*, 2015, **56**, 2803–2808.
- 4 N. Shah, E. Gravel, D. V. Jawale, E. Doris, I. N. N. Namboothiri, *ChemCatChem*, 2015, **7**, 57–61.
- 5 L. Yin, J. Liebscher, *Synthesis*, 2015, **8**, 1345–1349.
- 6 G. Kaupp, M. R. Naimi-Jamal, *Eur. J. Org. Chem.*, 2002, 1368–1373.
- 7 K. B. Harsha, K. S. Rangappa, *RSC Adv.*, 2016, **6**, 57154–57162.
- 8 C. Xie, Z. Zhang, B. Yang, G. Song, H. Geo, L. Wen, C. Ma, *Tetrahedron*, 2015, **71**, 1831–1837.
- 9 S. S. Mahadik, D. R. Garud, A. P. Ware, S. S. Pingale, R. M. Kamble, *Dyes Pigm.*, 2021, **184**, 108742.
- 10 Y.-B. Wang, L. Shi, X. Zhang, L.-R. Fu, W. Hu, W. Zhang, X. Zhu, X.-Q. Hao, M.-P. Song, *J. Org. Chem.*, 2021, **86**, 947–958.
- 11 K. S. Indalkar, C. K. Khatri, G. U. Chaturbuj, *J. Chem. Sci.*, 2017, **129**, 141–148.
- 12 J. J. Morales-Castellanos, K. Ramírez-Hernández, N. S. Gómez-Flores, O. R. Rodas-Suárez, J. Peralta-Cruz, *Molecules*, 2012, **17**, 5164–5176.
- 13 G. Shen, Z. Wang, X. Huang, S. Gong, J. Zhang, Z. Tang, M. Sun, X. Lv, *Dalton Trans.*, 2020, **49**, 13993–13998.
- 14 Y. Zhang, M. Luo, Y. Li, H. Wang, X. Ren, C. Qi, *Mol Divers.*, 2018, **22**, 183–189.
- 15 K. K. D. R. Viswanadham, M. P. Reddy, P. Sathyanarayana, O. Ravi, R. Kant, S. R. Bathula, *Chem Commun.*, 2014, **50**, 13517–13520.
- 16 S. Kano, S. Shibuya, Y. Yuasa, *J. Heterocycl. Chem.*, 1980, **17**, 1559–1561.
- 17 R. Nasielski-Hinkens, E. V. Vyver, J. Nasielski, *Bull. Soc. Chim. Belg.*, 1986, **95**, 663–670.
- 18 K. Aghapoor, H. R. Darabi, F. Mohsenzadeh, Y. Balavar, H. Daneshyar, *Transition Met. Chem.*, 2010, **35**, 49–53.
- 19 J. Pogula, S. Laha, P. R. Likhar, *Catal Lett.*, 2017, **147**, 2724–2735.

## 2. Copies of $^1\text{H}$ NMR and $^{13}\text{C}$ NMR spectra of quinoxalines

$^1\text{H}$  NMR spectrum of compound **3ag**:

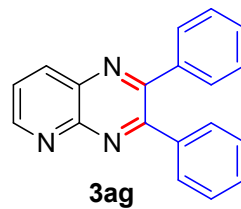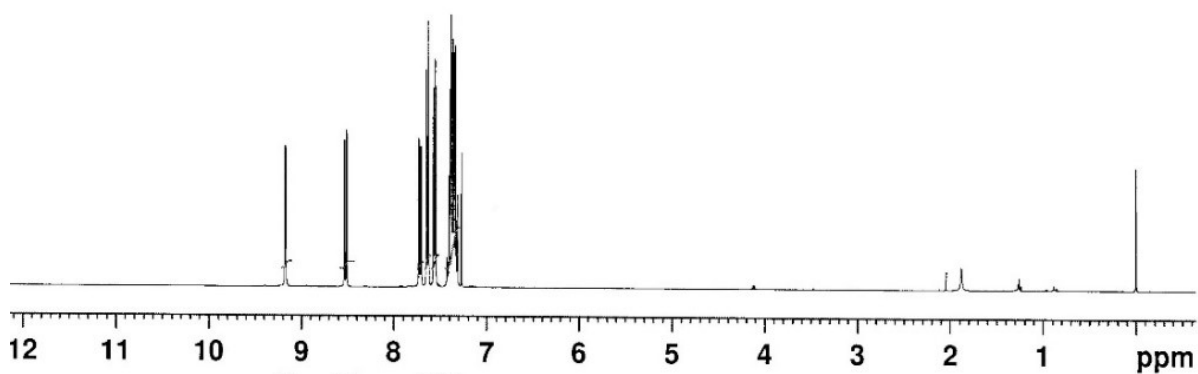

$^{13}\text{C}$  NMR spectrum of compound **3ag**:

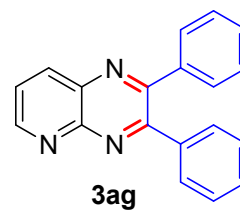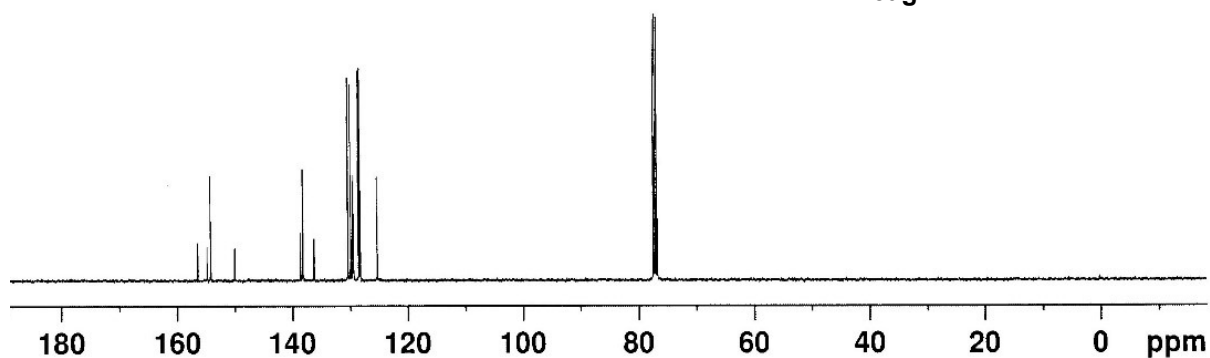



<sup>1</sup>H NMR spectrum of compound **3ah**:

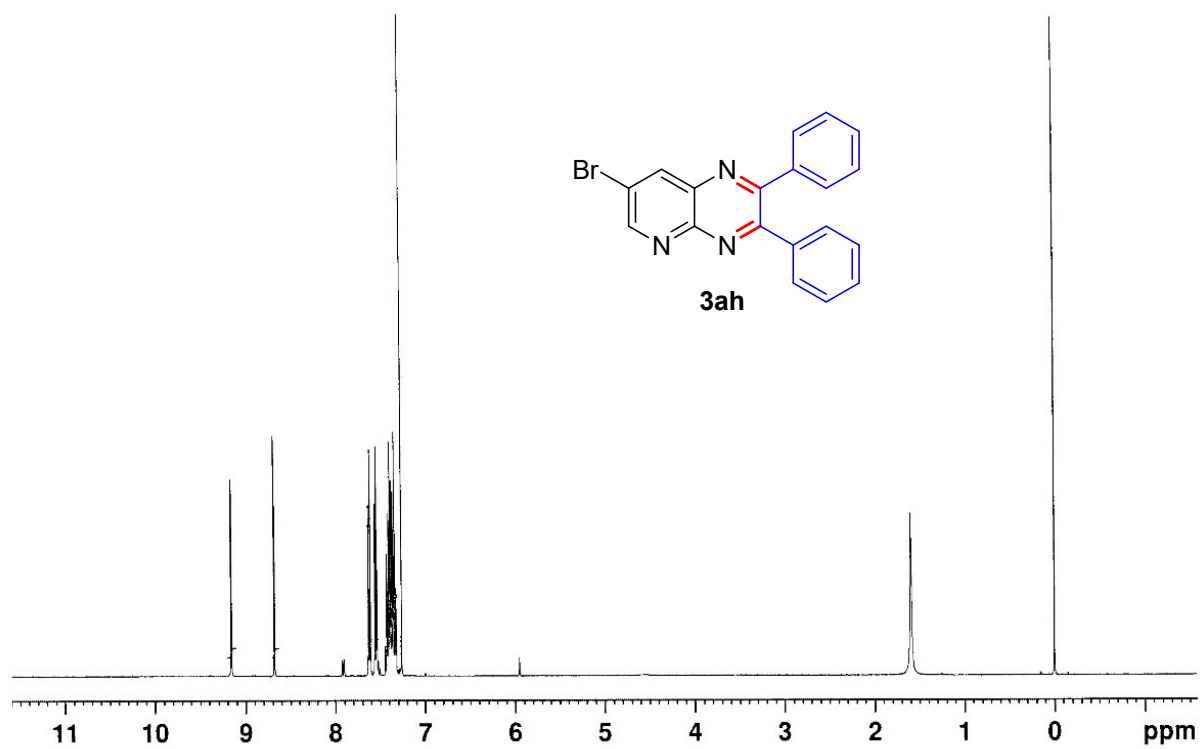

<sup>13</sup>C NMR spectrum of compound **3ah**:

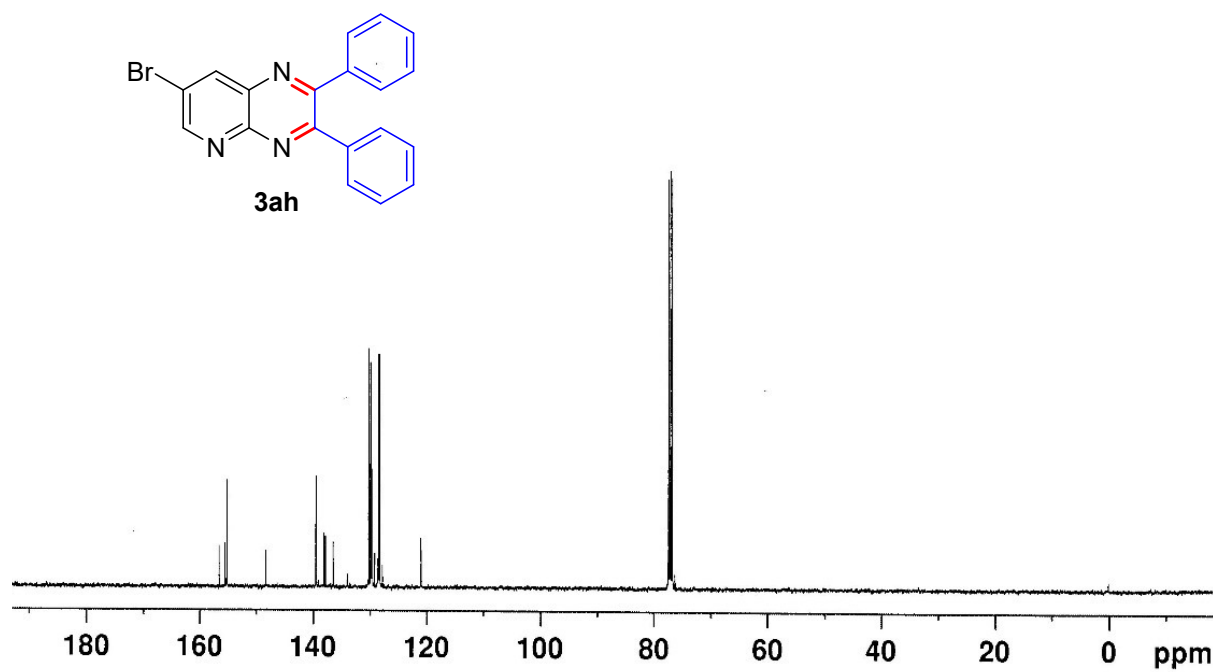

$^1\text{H}$  NMR spectrum of compound **3an**:

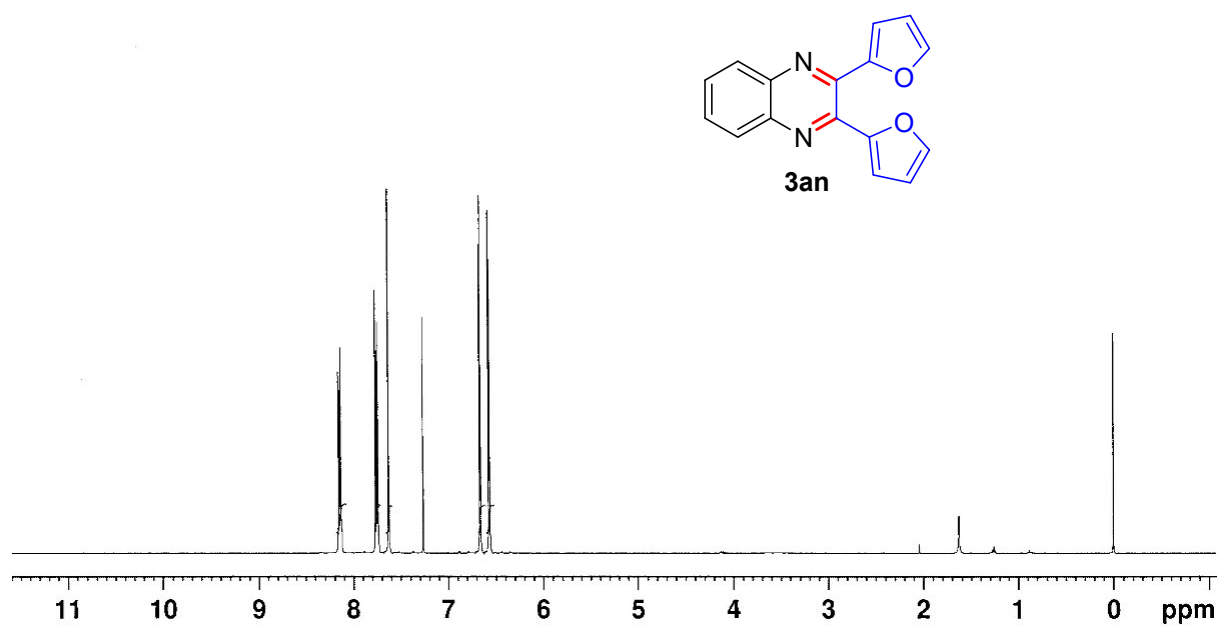

$^{13}\text{C}$  NMR spectrum of compound **3an**:

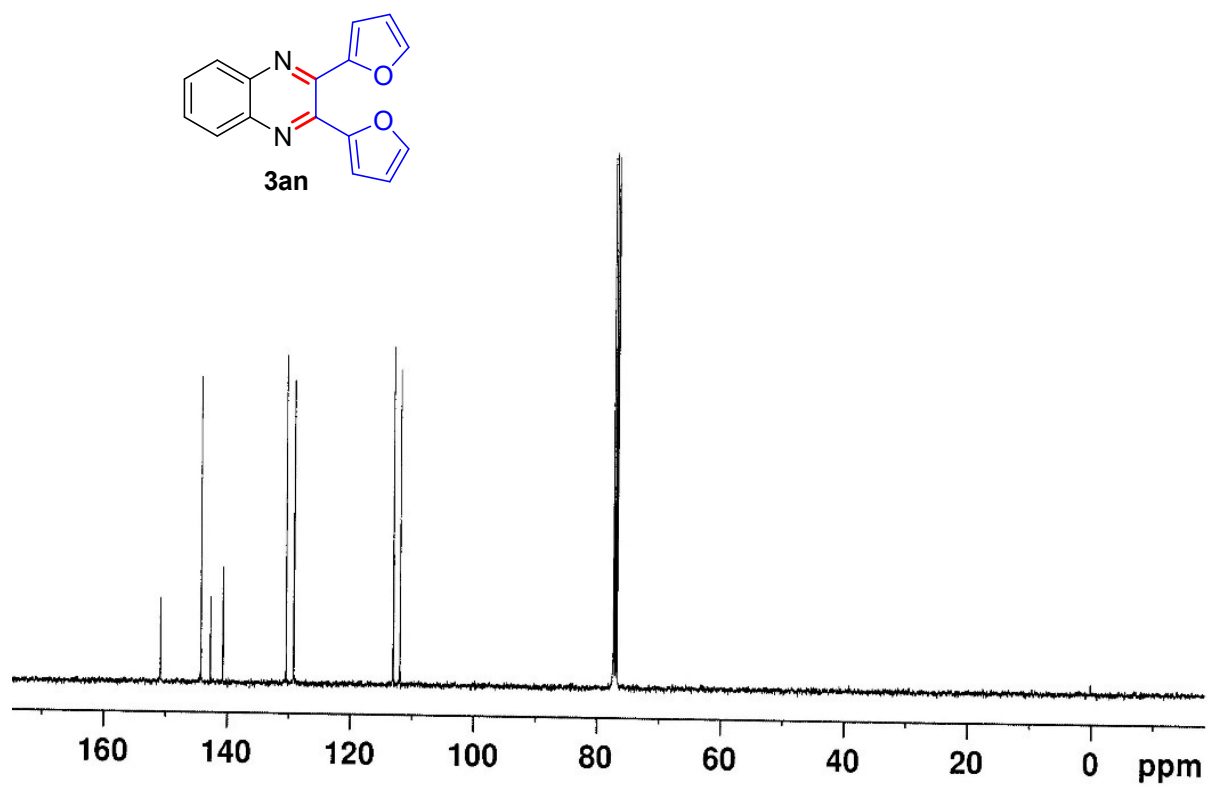

$^1\text{H}$  NMR spectrum of compound **3ao**:

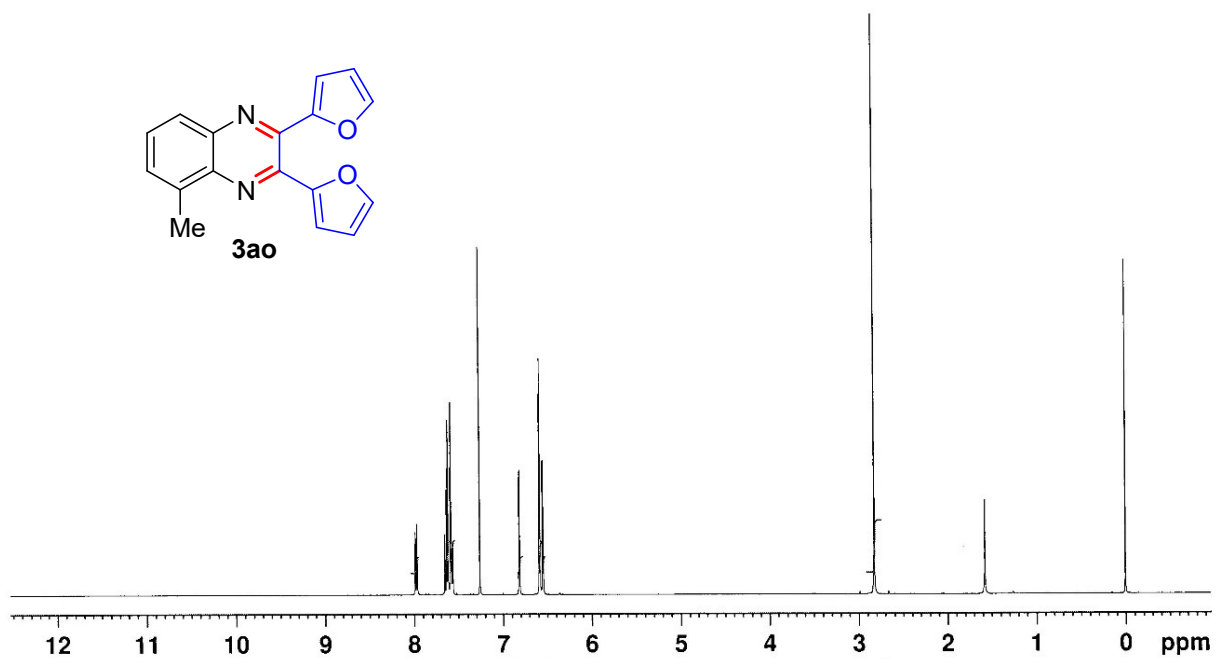

$^{13}\text{C}$  NMR spectrum of compound **3ao**:

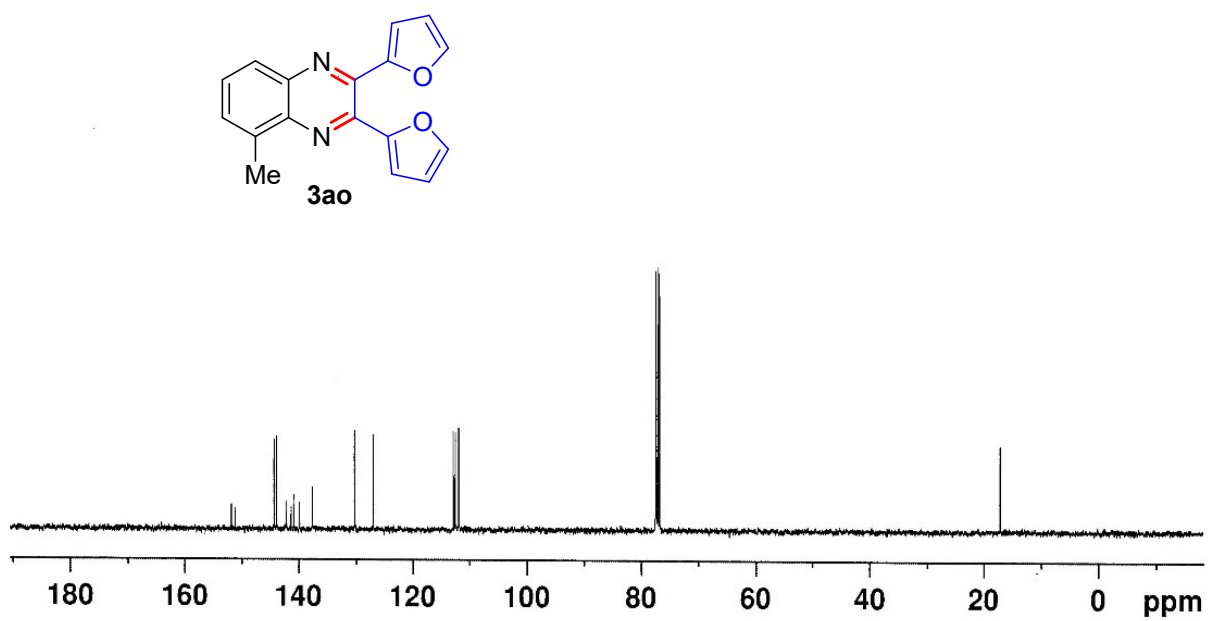

$^1\text{H}$  NMR spectrum of compound **3as**:

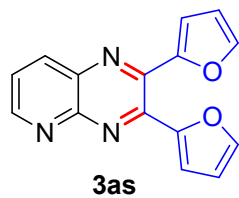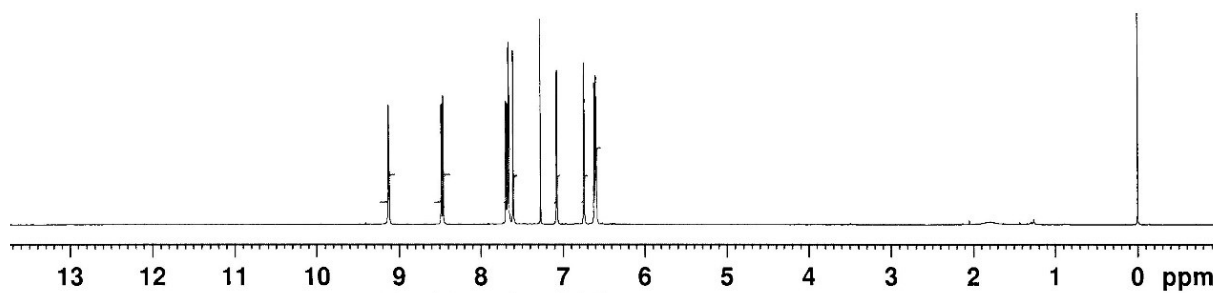

$^{13}\text{C}$  NMR spectrum of compound **3as**:

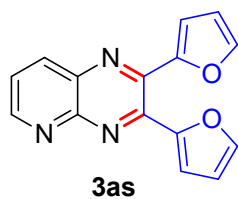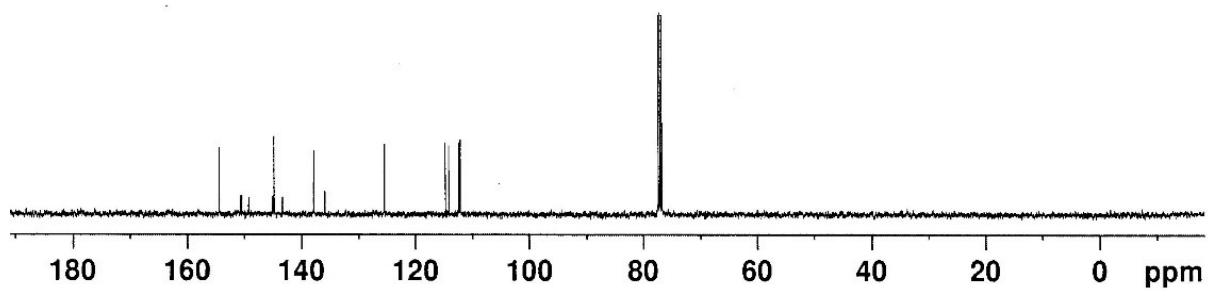

$^1\text{H}$  NMR spectrum of compound **3at**:

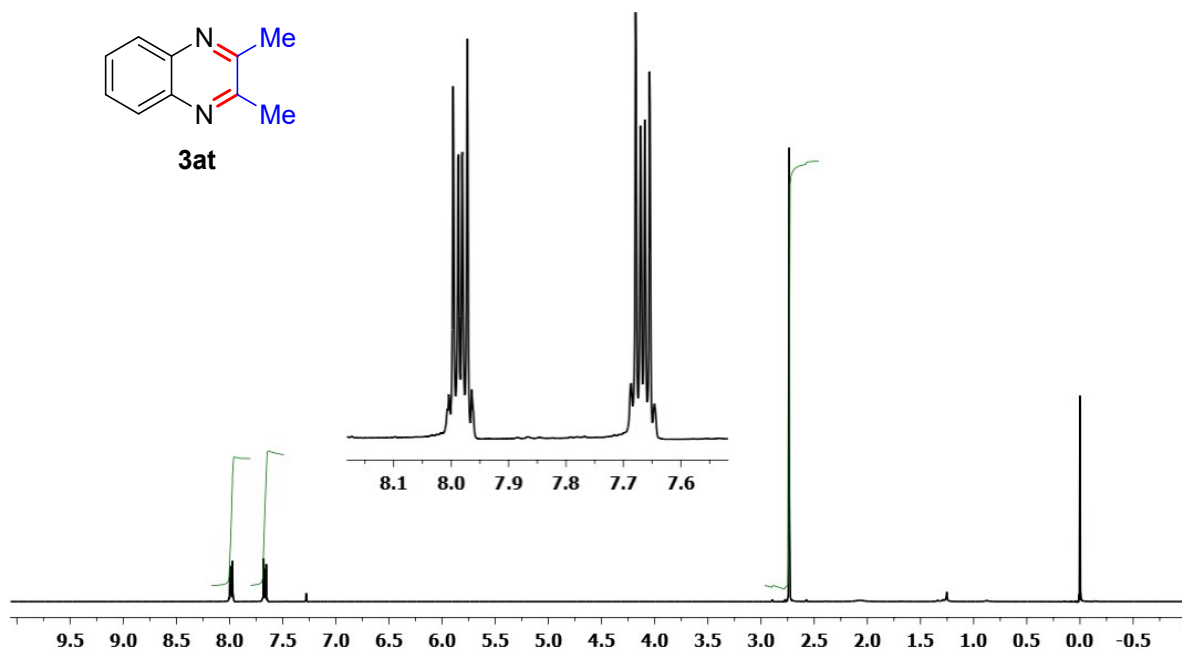

$^{13}\text{C}$  NMR spectrum of compound **3at**:

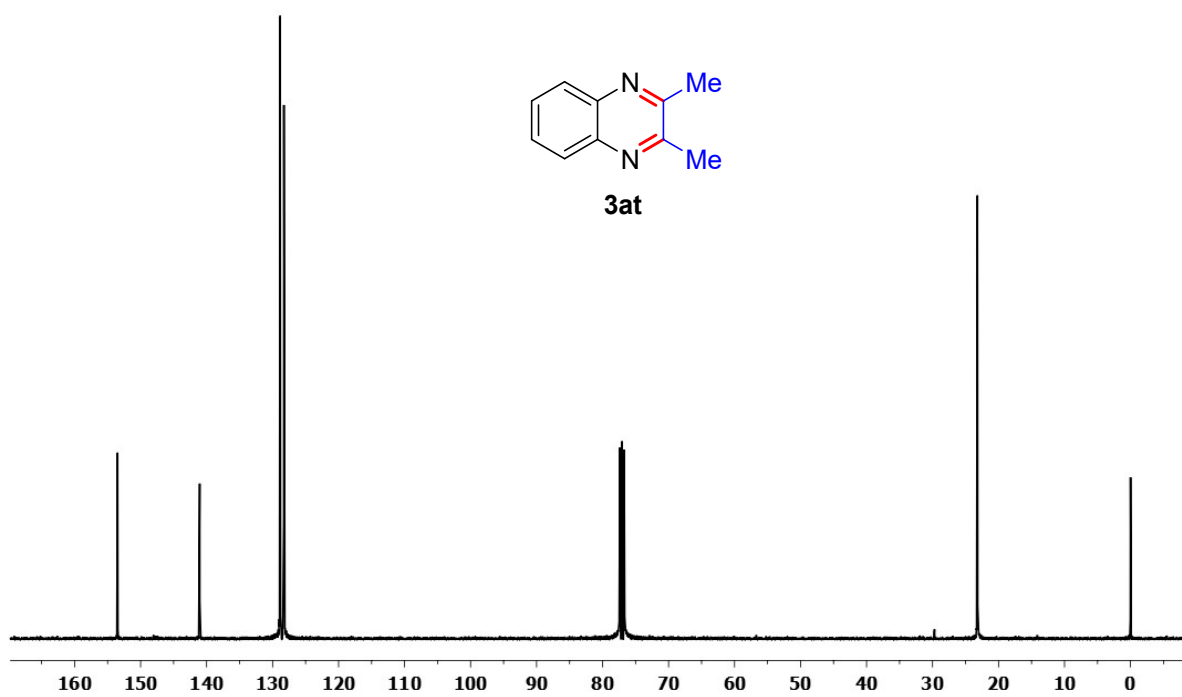

$^1\text{H}$  NMR spectrum of compound **3au**:

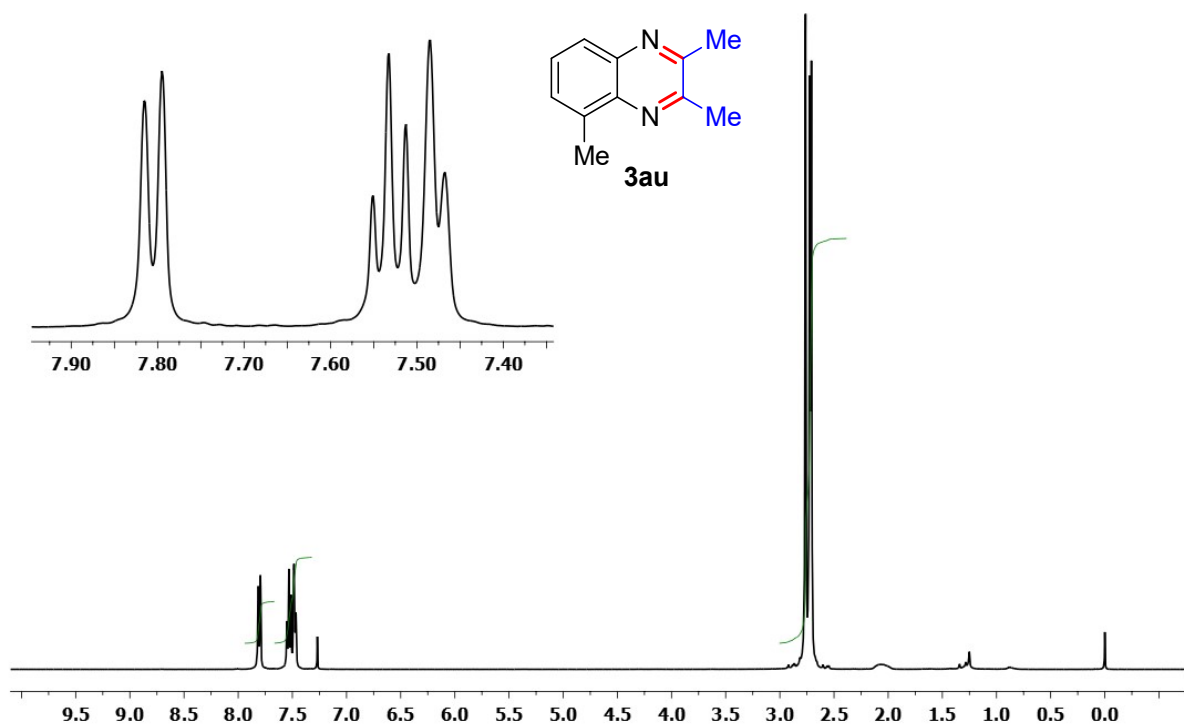

$^{13}\text{C}$  NMR spectrum of compound **3au**:

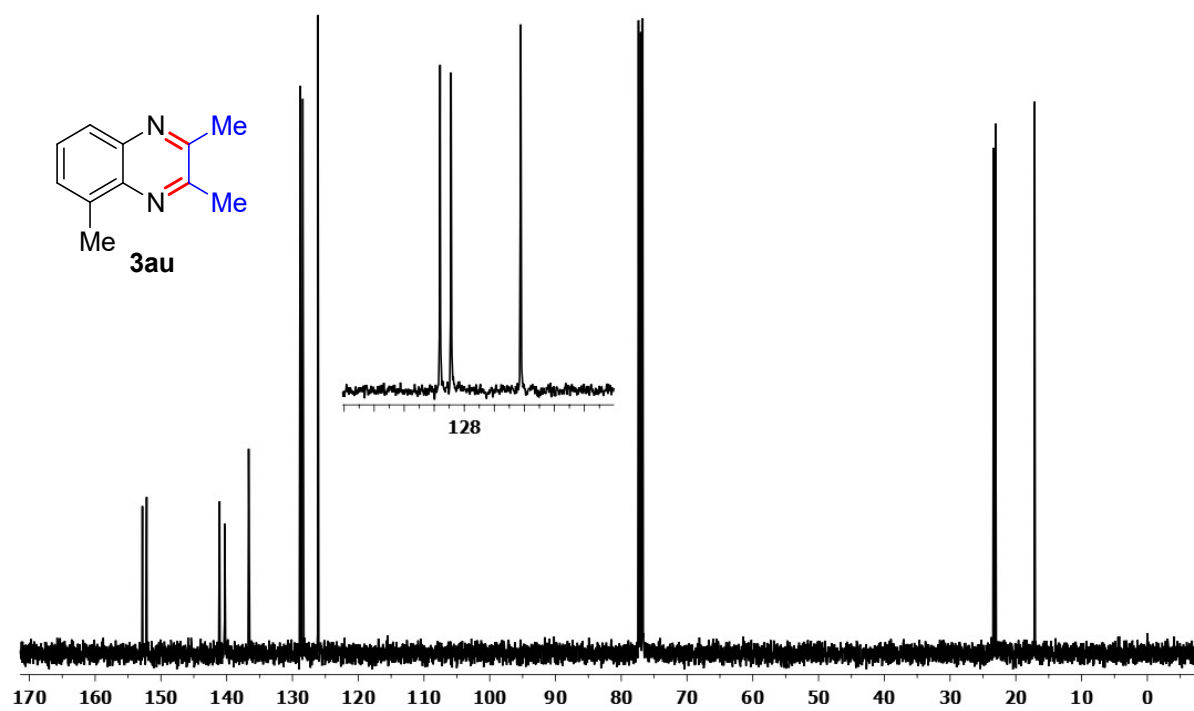

$^1\text{H}$  NMR spectrum of compound **3av**:

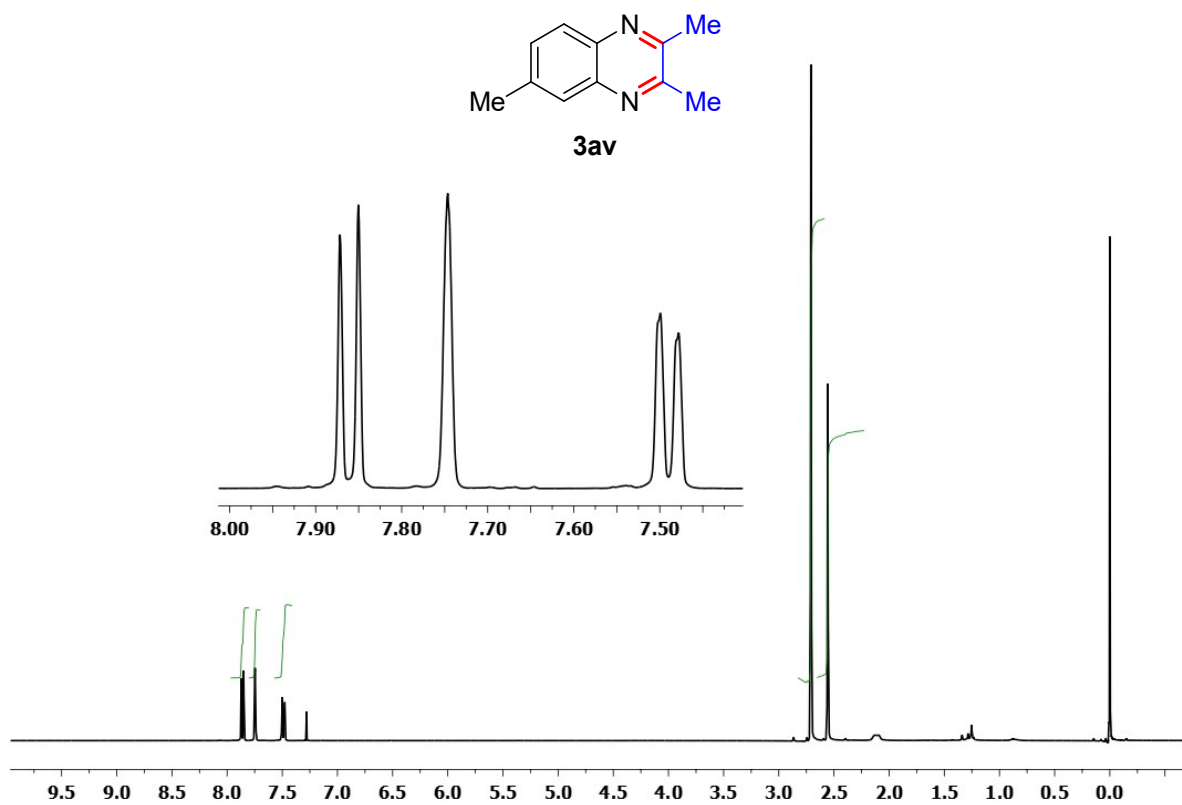

$^{13}\text{C}$  NMR spectrum of compound **3av**:

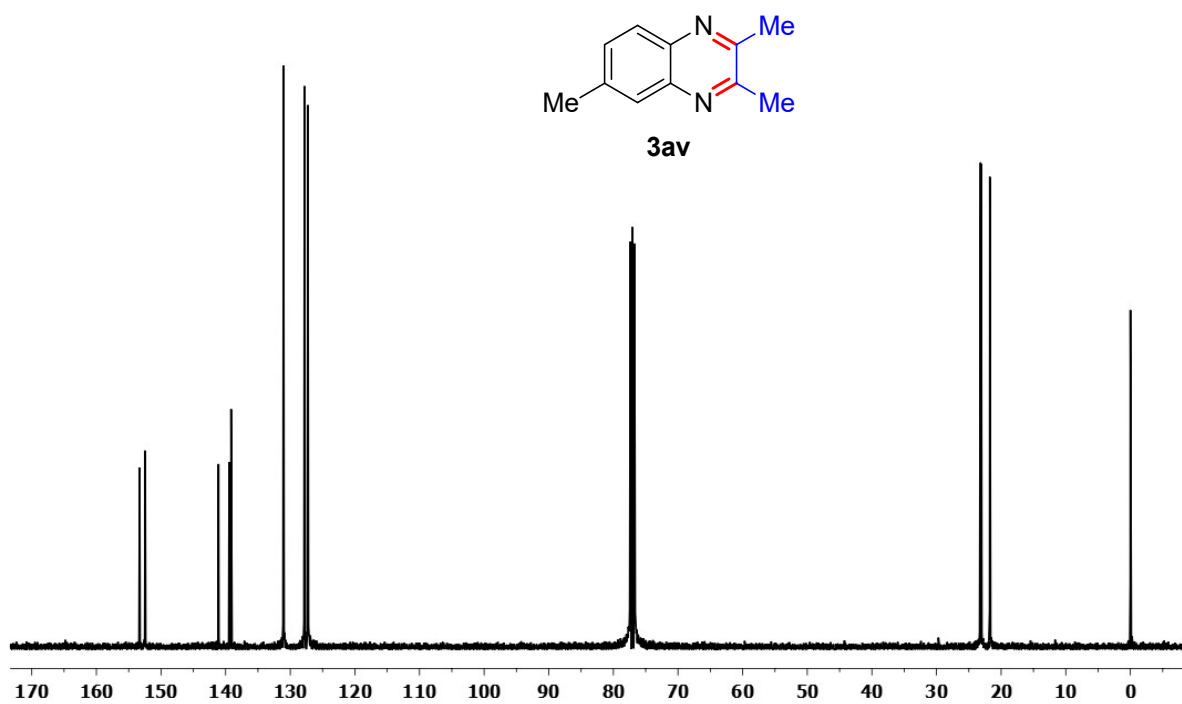

$^1\text{H}$  NMR spectrum of compound **3aw**:

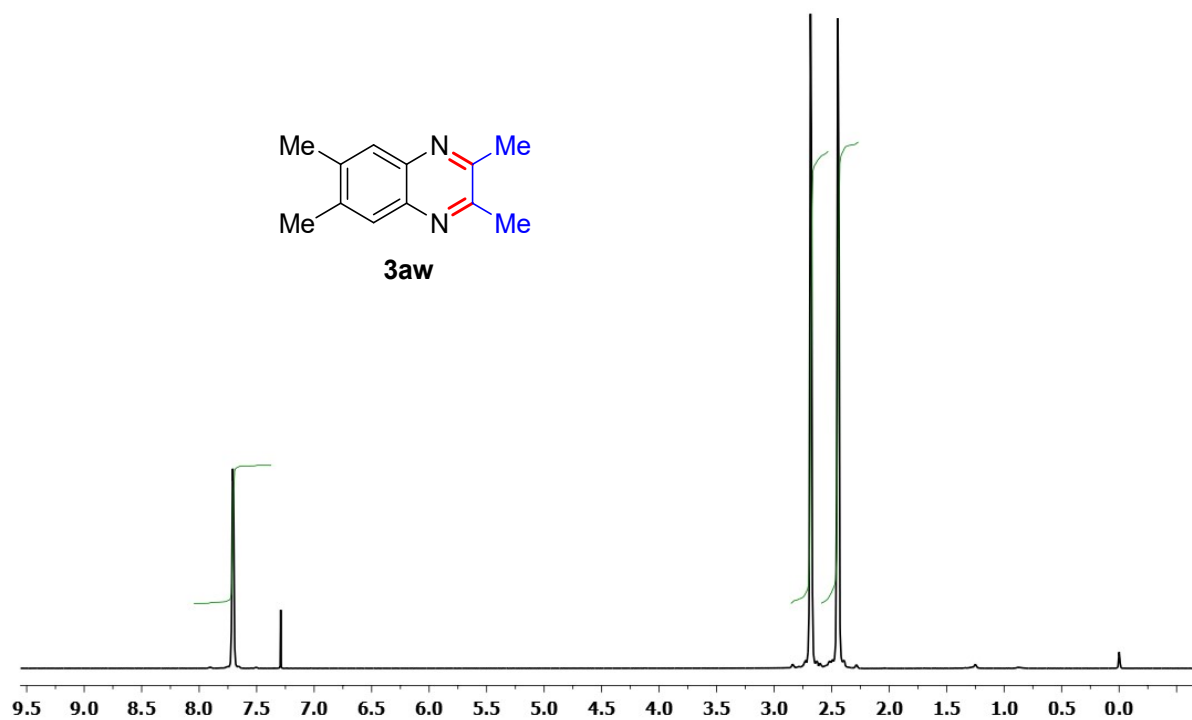

$^{13}\text{C}$  NMR spectrum of compound **3aw**:

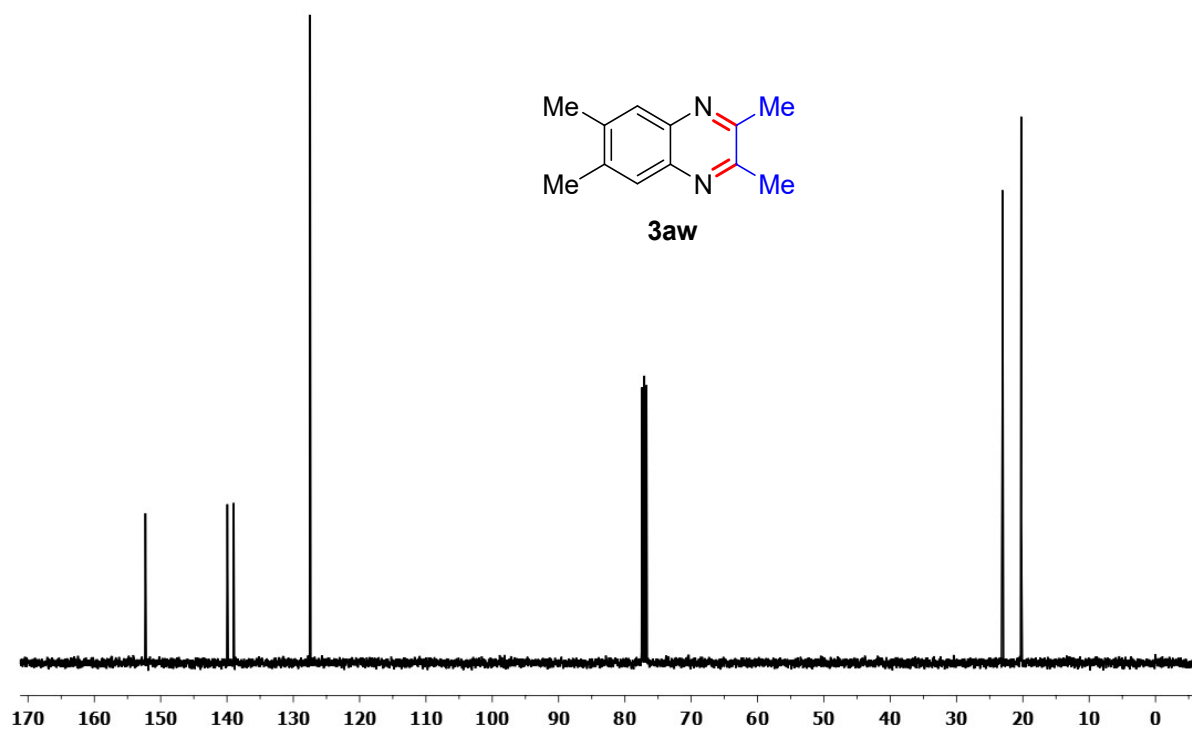



$^1\text{H}$  NMR spectrum of compound **3ax**:

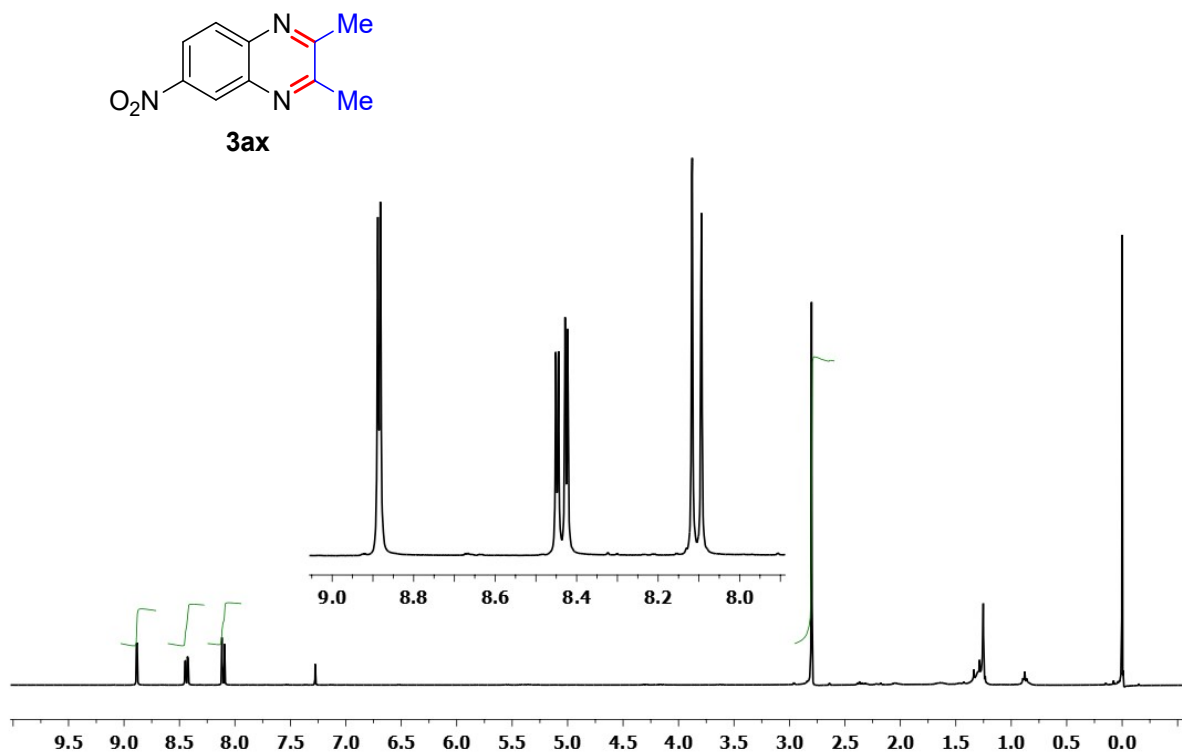

$^{13}\text{C}$  NMR spectrum of compound **3ax**:

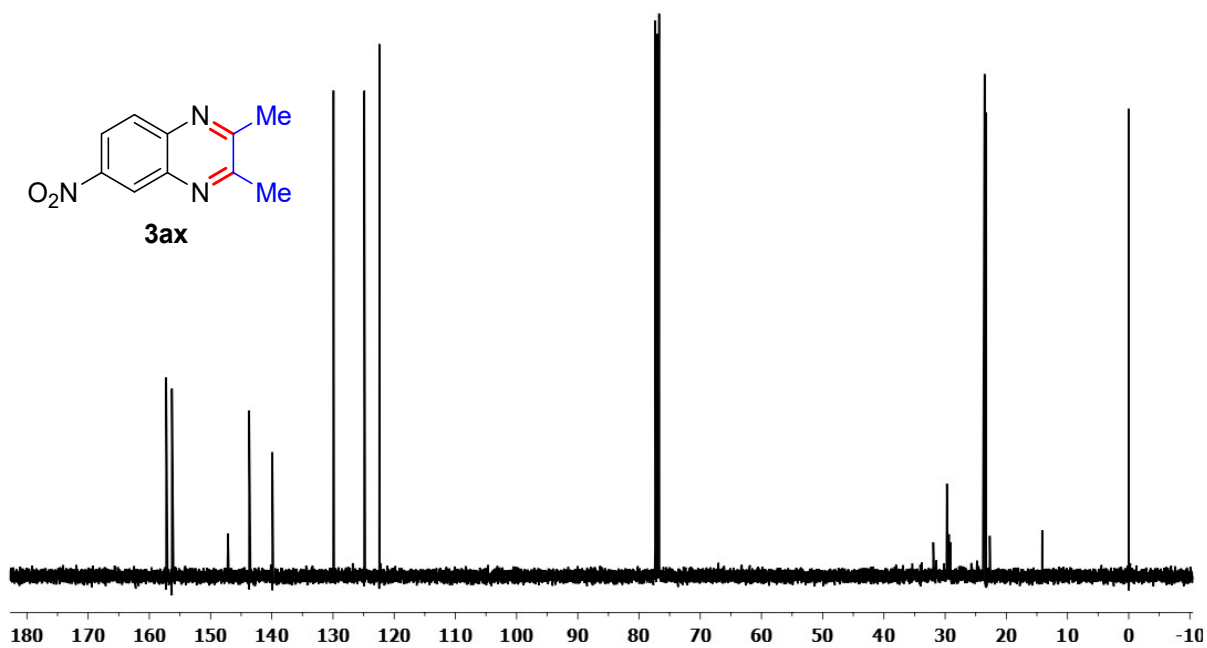

$^1\text{H}$  NMR spectrum of compound **3ay**:

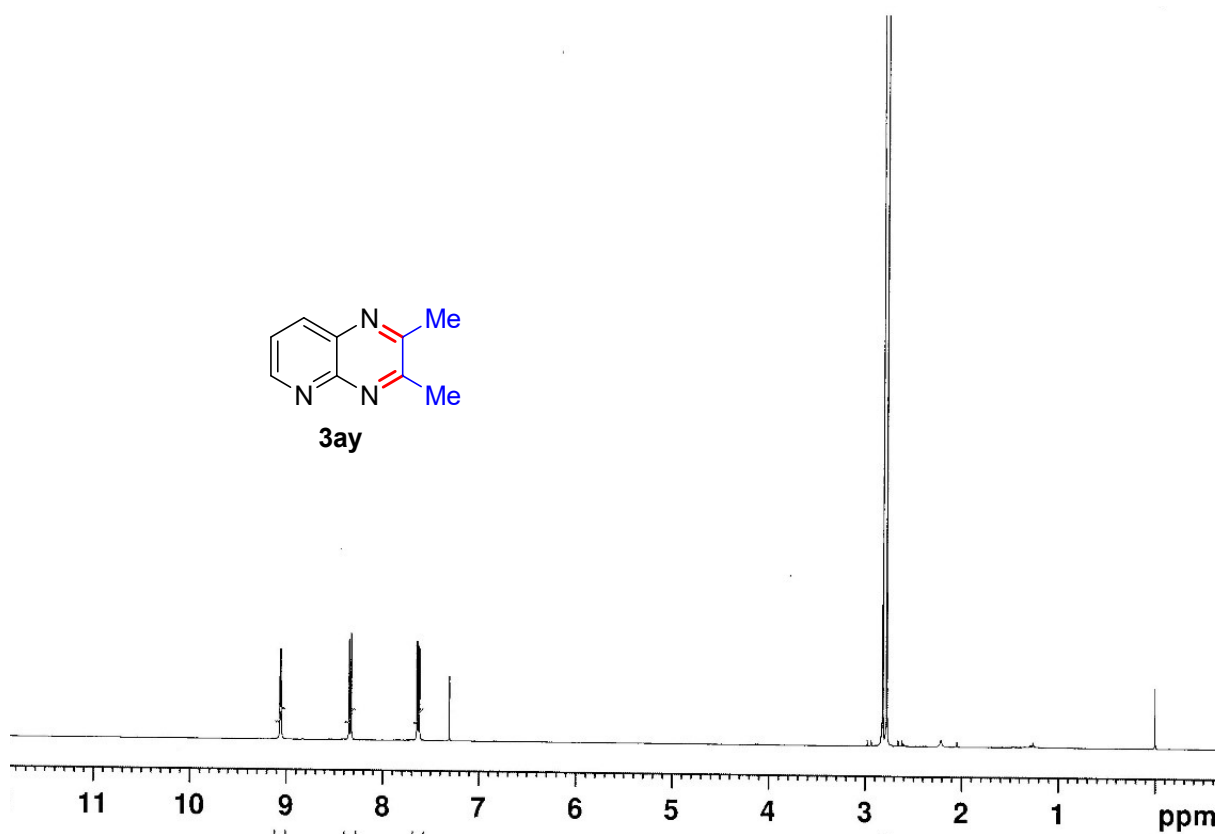

$^{13}\text{C}$  NMR spectrum of compound **3ay**:

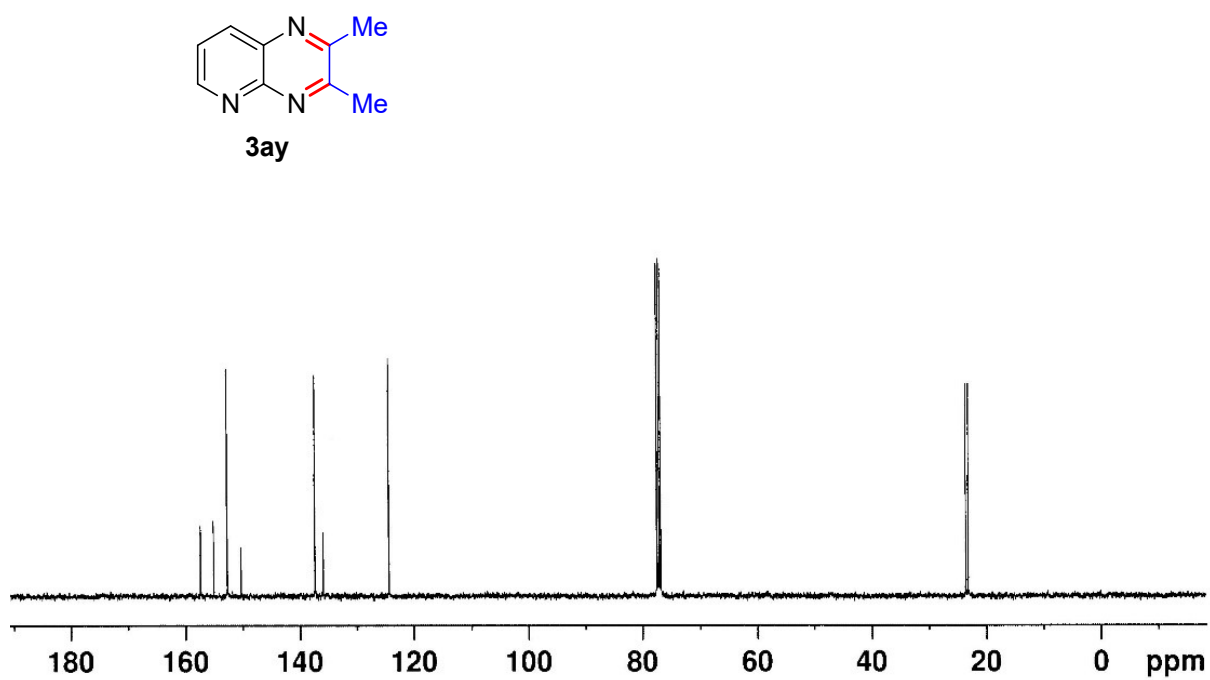

$^1\text{H}$  NMR spectrum of compound **3az**:

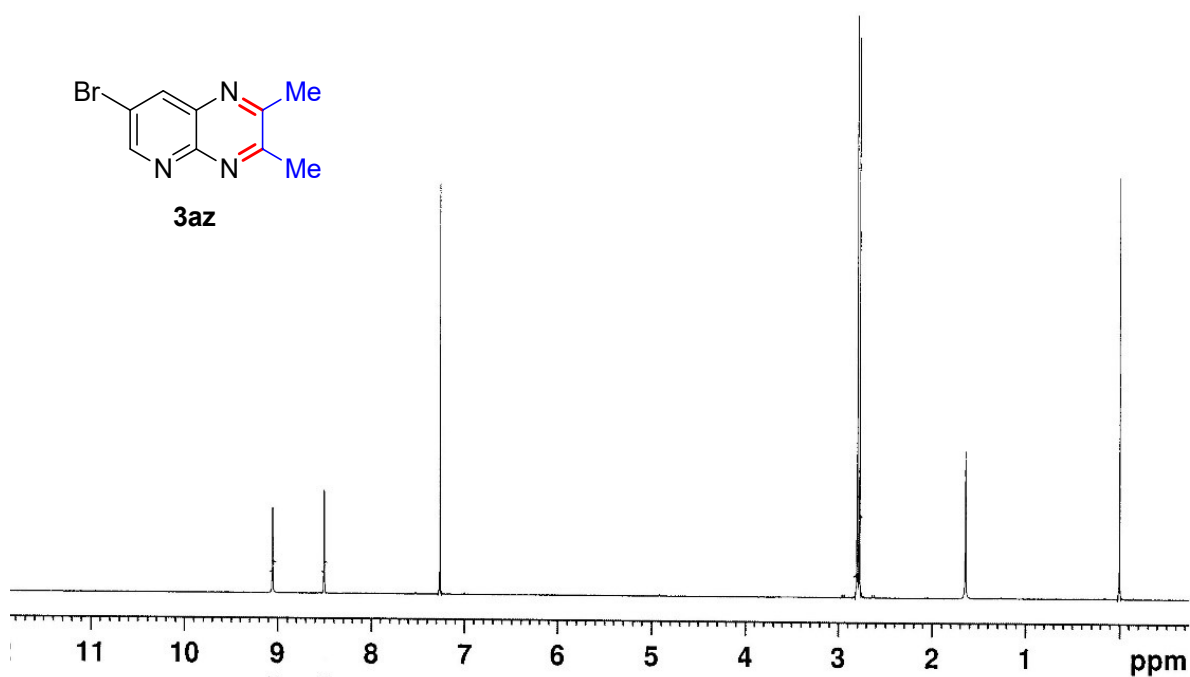

$^{13}\text{C}$  NMR spectrum of compound **3az**:

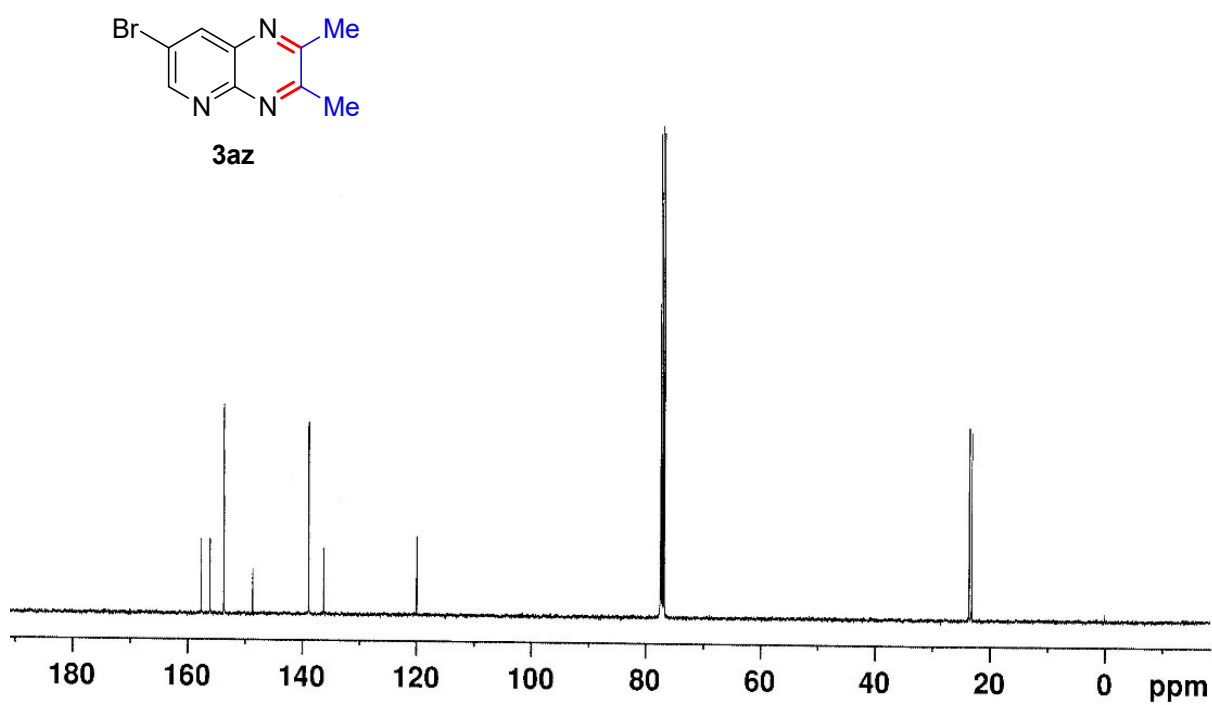

$^1\text{H}$  NMR spectrum of compound **3ba**:

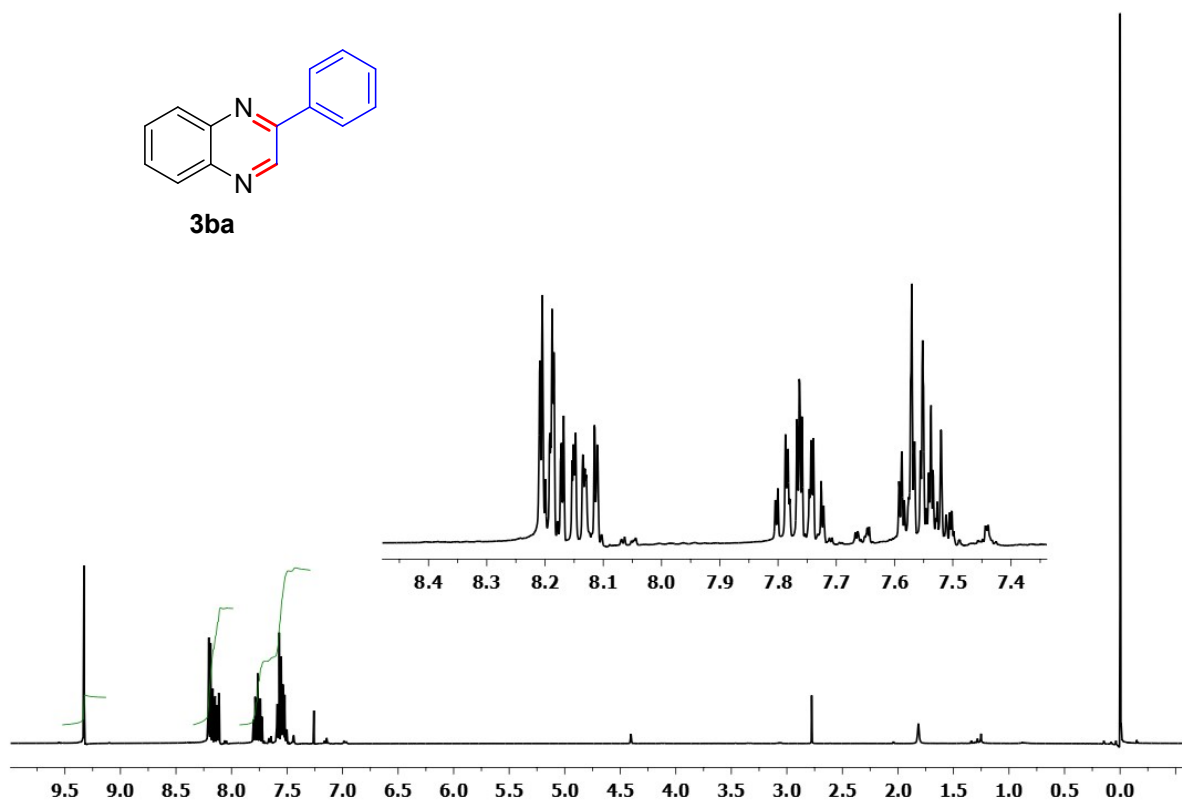

$^{13}\text{C}$  NMR spectrum of compound **3ba**:

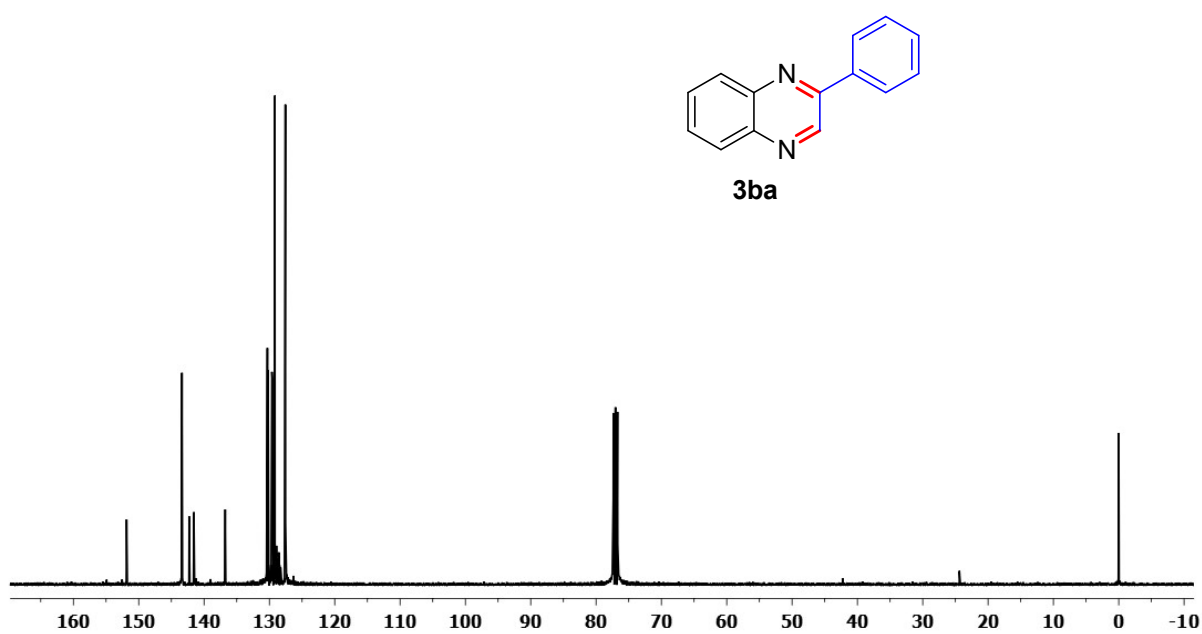

<sup>1</sup>H NMR spectrum of compound **3be**:

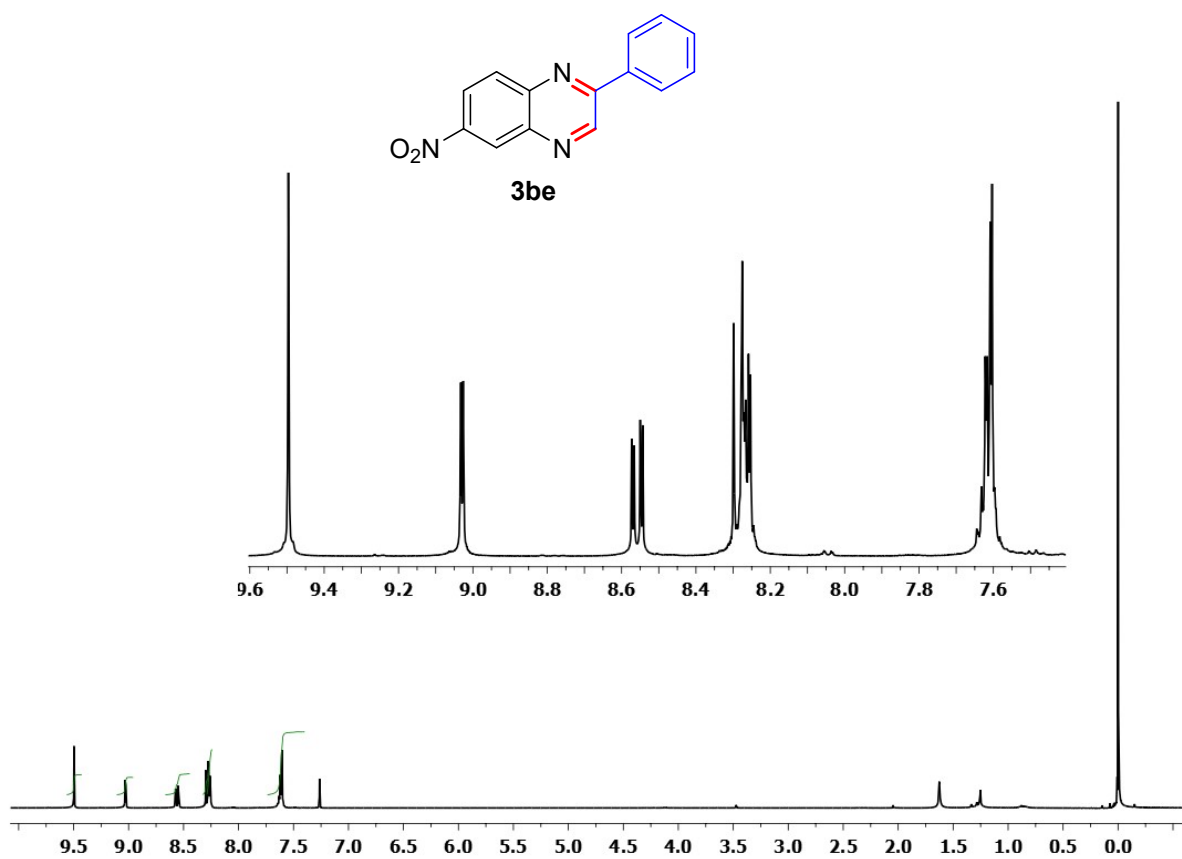

<sup>13</sup>C NMR spectrum of compound **3be**:

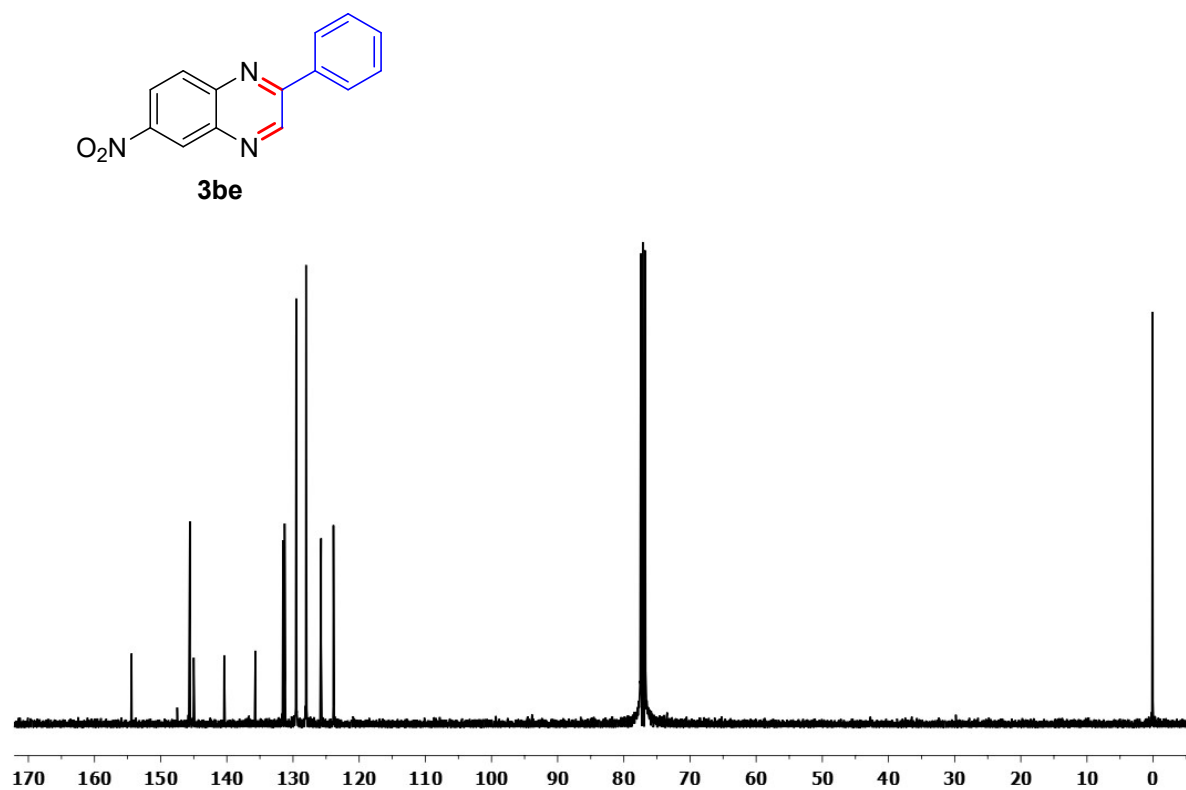

### 3. XPS Analysis of WEPA

The XPS analysis of WEPA was showed the presence of K, Mg, Ca, C, O, Cl in WEPA.<sup>1</sup>

#### *Survey spectrum*

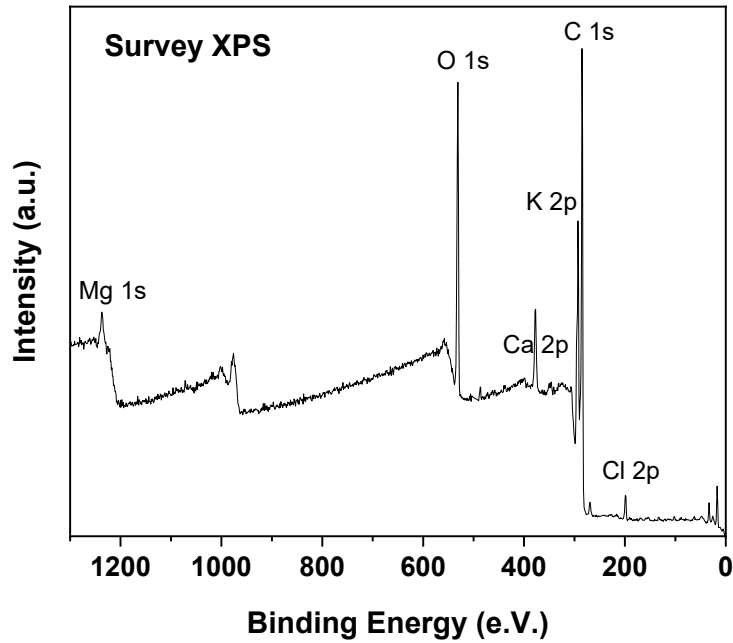

#### *K 2p*

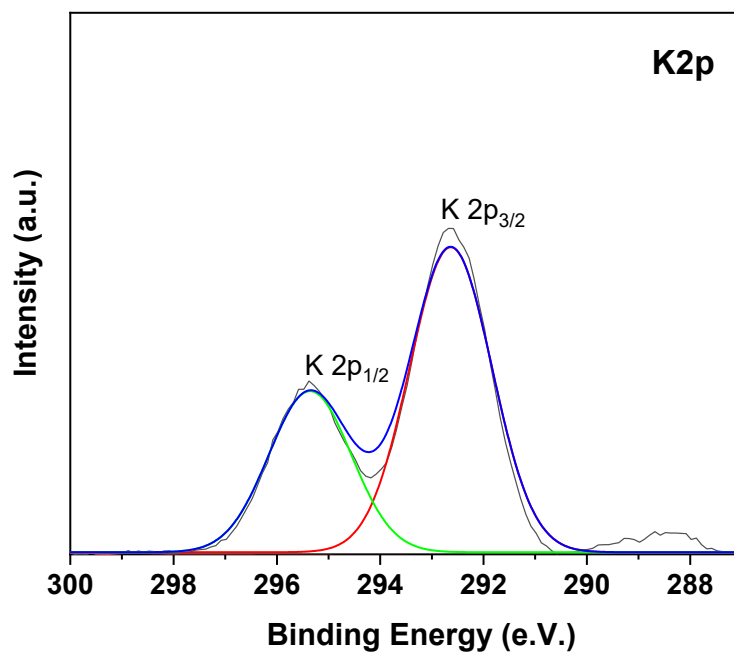

*Mg 1s*

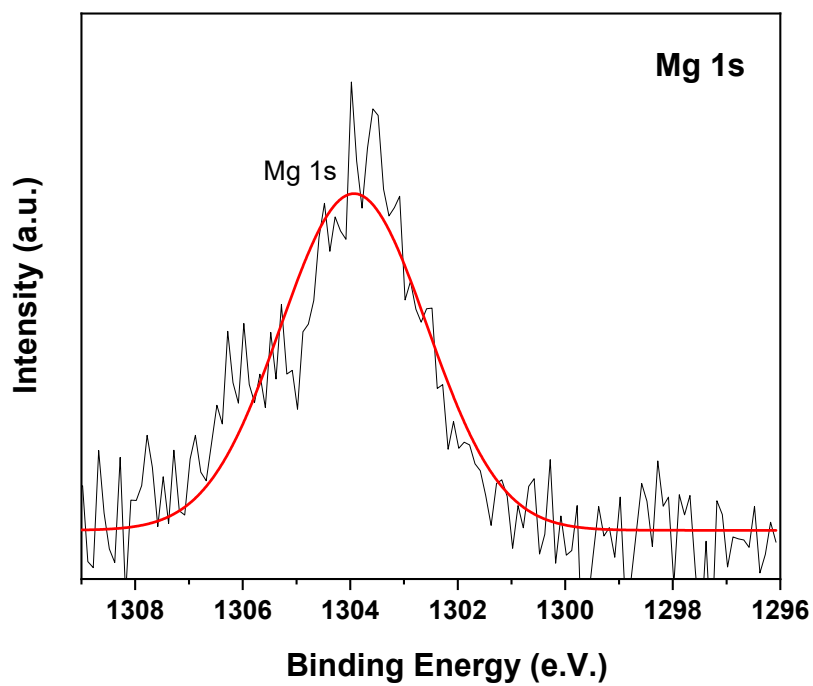

*Ca 2p*

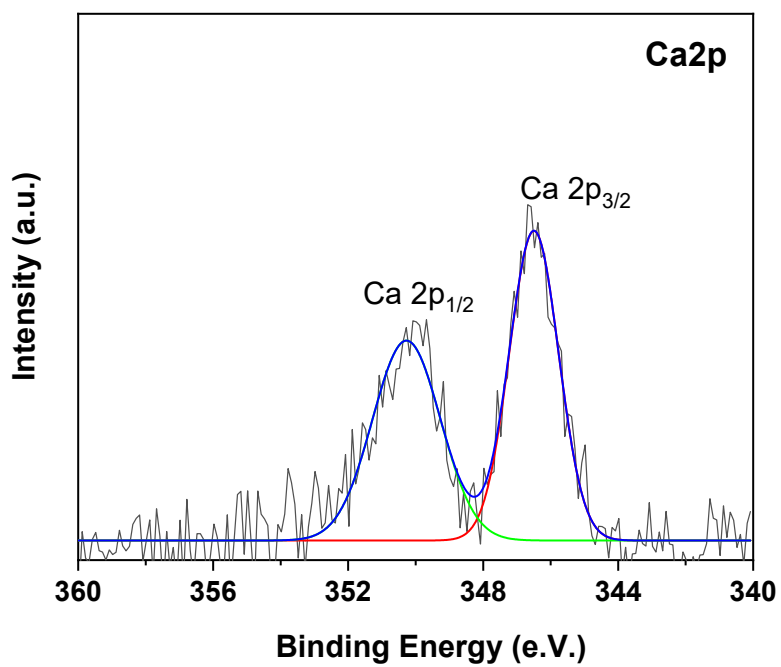

*C 1s*

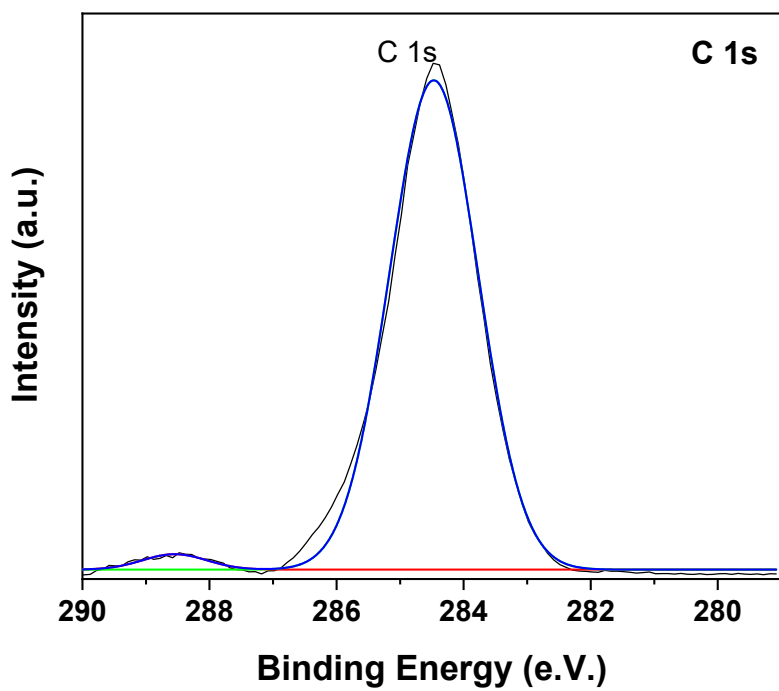

*O 1s*

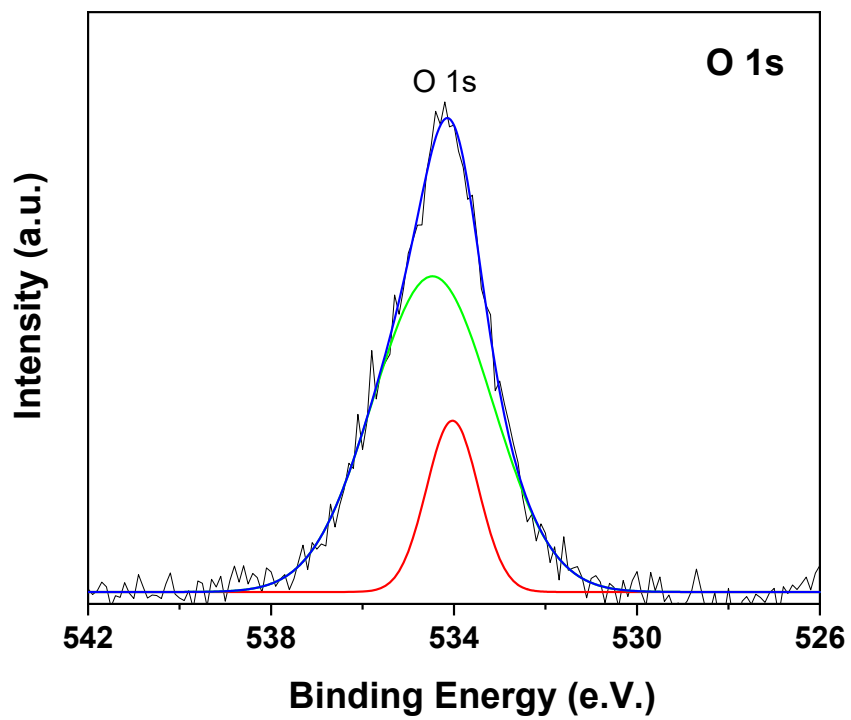



Cl 2p

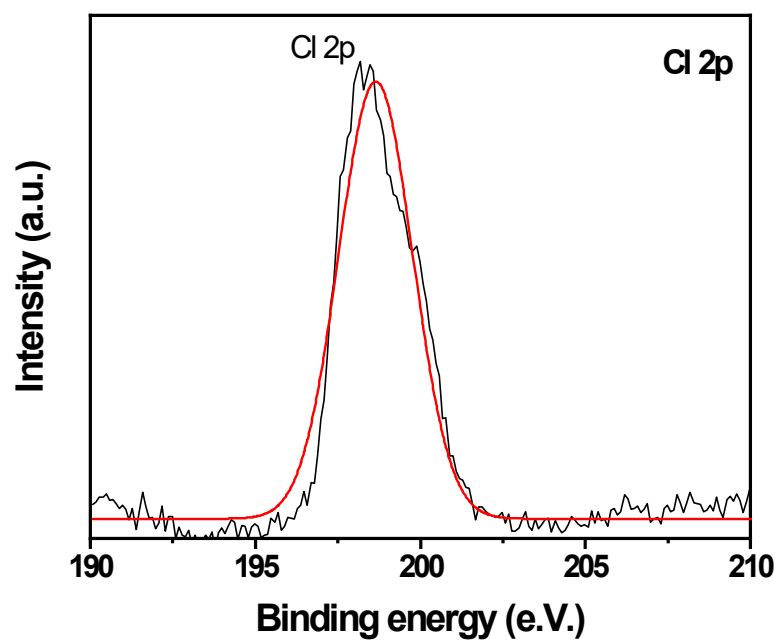

## Reference

- 1 J. Lakshmidēvi, R. M. Appa, B. R. Naidu, S. S. Prasad, L. S. Sarma, K. Venkateswarlu, *Chem. Commun.*, 2018, **54**, 12333–12336.

#### 4. XRF analysis of WEPA.

The X-ray fluorescence (XRF) data of WEPA is showed in the following table which indicates the presence of large quantity of K<sub>2</sub>O and chlorides in WEPA. It also showed the presence of minor quantities of Na<sub>2</sub>O, SO<sub>3</sub>, MgO, CaO, Al<sub>2</sub>O<sub>3</sub> and SiO<sub>2</sub> along with very minor quantities of other metallic/non-metallic species.<sup>1,2</sup>

**Table** XRF data of WEPA<sup>a</sup>.

| Entry | Compound                       | Reference 1 | Reference 2 | Unit |
|-------|--------------------------------|-------------|-------------|------|
| 1     | K <sub>2</sub> O               | 66.513      | 64.309      | %    |
| 2     | Cl                             | 19.393      | 23.504      | %    |
| 3     | SiO <sub>2</sub>               | 1.926       | 1.577       | %    |
| 4     | MgO                            | 1.895       | 1.599       | %    |
| 5     | Na <sub>2</sub> O              | 2.197       | 2.629       | %    |
| 6     | Fe <sub>2</sub> O <sub>3</sub> | 0.152       | 936 (ppm)   | %    |
| 7     | ZnO                            | 71.8        | 35.3 (Zn)   | ppm  |
| 8     | CaO                            | 2.112       | 1.545       | %    |
| 9     | SrO                            | 0.132       | -           | %    |
| 10    | SO <sub>3</sub>                | 3.892       | 4.331       | %    |
| 11    | P <sub>2</sub> O <sub>5</sub>  | 576.4       | 757.1       | ppm  |
| 12    | Al <sub>2</sub> O <sub>3</sub> | 0.236       | 0.131       | %    |
| 13    | Cu                             | 193.6       | 70.8        | ppm  |
| 14    | Br                             | 0.136       | 0.159       | %    |
| 15    | Cr <sub>2</sub> O <sub>3</sub> | 11.4        | -           | ppm  |
| 16    | MnO                            | 51.2        | -           | ppm  |
| 17    | TiO <sub>2</sub>               | 19.2        | -           | ppm  |
| 18    | Y                              | 6.5         | 5.9         | ppm  |
| 19    | Rb                             | -           | 251.3       | ppm  |
| 20    | Bi                             | -           | 38.4        | ppm  |
| 21    | Ni                             | -           | 65.1        | ppm  |

<sup>a</sup>This data is based on semi-quantitative analysis.

#### References

- 1 R. M. Appa, J. Lakshmidivi, B. R. Naidu, K. Venkateswarlu, *Mol. Catal.*, 2021, **501**, 111366.
- 2 B. R. Naidu, J. Lakshmidivi, B. S. S. Naidu, K. Venkateswarlu, *Mol. Catal.*, 2021, **511**, 111719.
